# Supplementary material for: Exploring dengue genome to construct a multi-epitope based subunit vaccine by utilizing immunoinformatics approach to battle against dengue infection
Source: PubMed Central journal article supplement (PMC5569093; doi:10.1038/s41598-017-09199-w), 2017-08-23
Supplement: 41598_2017_9199_MOESM1_ESM.pdf [file 41598_2017_9199_MOESM1_ESM.pdf]

**Exploring dengue genome to construct a multi-epitope based subunit vaccine  
by utilizing immunoinformatics approach to battle against dengue infection**

**Mudassar Ali<sup>1</sup>, Rajan Kumar Pandey<sup>1</sup>, Nazia Khatoon<sup>1</sup>, Aruna Narula<sup>1</sup>, Amit Mishra<sup>2</sup>,  
Vijay Kumar Prajapati<sup>1\*</sup>**

<sup>1</sup>Department of Biochemistry, School of Life Sciences, Central University of Rajasthan,  
Bandarsindri, Kishangarh, Ajmer, 305817 Rajasthan, India.

<sup>2</sup>Cellular and Molecular Neurobiology Unit, Indian Institute of Technology Jodhpur, Jodhpur,  
India.

**Supplementary table 1:** Predicted CTL epitopes for structural and non-structural proteins of dengue virus

| <b>S. No.</b> | <b>Protein</b> | <b>Sequence</b> | <b>Score</b> |
|---------------|----------------|-----------------|--------------|
| 1.            | <b>prM</b>     | TMMAAILAY       | 1.9915       |
| 2.            |                | NSTSTWVTY       | 1.9773       |
| 3.            |                | ELCEDTITY       | 1.1954       |
| 4.            |                | MSSEGAWKH       | 0.9068       |
| 5.            |                | TTEAELTGY       | 3.1769       |
| 6.            |                | VVQPENLEY       | 2.1081       |
| 7.            |                | QMSSGNLLF       | 1.3564       |
| 8.            |                | QMENKAWLV       | 1.3366       |
| 9.            |                | STSLSVTLV       | 1.2983       |
| 10.           |                | VLVGIVTLY       | 1.0105       |
| 11.           |                | GTIVIRVQY       | 0.9172       |
| 12.           |                | KLQLKGMSY       | 0.8061       |
| 13.           | <b>NS-1</b>    | STESHNQTF       | 2.0681       |
| 14.           |                | NVHTWTEQY       | 1.5861       |
| 15.           |                | FTTNIWLKL       | 0.941        |
| 16.           |                | ITDNVHTWT       | 0.929        |
| 17.           |                | WNSLEVEDY       | 0.7769       |
| 18.           | <b>NS-2A</b>   | MTDDIGMGV       | 2.2165       |
| 19.           |                | LTDALALGM       | 1.8278       |
| 20.           |                | KTDWIPLAL       | 1.5206       |
| 21.           |                | QVDNFSLGV       | 1.2211       |
| 22.           |                | NMEKYQLAV       | 0.8604       |
| 23.           |                | KMVRNMEKY       | 0.7628       |
| 24.           | <b>NS-2B</b>   | ITAAAWYLLW      | 0.786        |
| 25.           | <b>NS-3</b>    | KVDAIDGEY       | 2.7669       |
| 26.           |                | YSQIGAGVY       | 2.6923       |
| 27.           |                | KAELEDGAY       | 1.5754       |
| 28.           |                | FTDPASIAA       | 1.4073       |
| 29.           |                | RVAAEGINY       | 1.2975       |
| 30.           |                | YSDPLALKE       | 1.2756       |
| 31.           |                | LSPVRVPNY       | 1.1299       |
| 32.           |                | VTDFKGKTV       | 0.9561       |
| 33.           |                | GVVTRSGAY       | 0.9323       |
| 34.           |                | RTNDWDFVV       | 0.782        |
| 35.           |                | <b>NS-4A</b>    | ITASILLWY    |
| 36.           | TAEAGGRAY      |                 | 1.3092       |
| 37.           | <b>NS-4B</b>   | VIDLDPIPY       | 1.7757       |
| 38.           |                | LTAALFLLV       | 1.6802       |
| 39.           |                | MANIFRGSY       | 1.4976       |
| 40.           |                | YLAGAGLLF       | 1.1565       |
| 41.           |                | ALFLLVAHY       | 0.7708       |

|     |             |           |        |
|-----|-------------|-----------|--------|
| 42. |             | TTLTAALFL | 0.7589 |
| 43. | <b>NS-5</b> | YTDYMPSMK | 2.2662 |
| 44. |             | ETACLGKSY | 1.6863 |
| 45. |             | LINRFTMRY | 1.6043 |
| 46. |             | RSLIGNEEY | 1.5943 |
| 47. |             | FTDENKWKS | 1.5825 |
| 48. |             | KTWAYHGSY | 1.5116 |
| 49. |             | MTDTTPFGQ | 1.2392 |
| 50. |             | YDQMWSLMY | 1.1344 |
| 51. |             | KMEALQRKY | 1.1153 |
| 52. |             | ASSMVNGVF | 1.113  |
| 53. |             | MTTEDMLTV | 1.1008 |
| 54. |             | LTSRATWAK | 0.9451 |
| 55. |             | MSTYGWNLV | 0.9043 |
| 56. |             | QEHETSWHY | 0.8155 |
| 57. |             | FLEFEALGF | 0.8038 |
| 58. |             | AEAIFKLTY | 0.8019 |
| 59. |             | GSAKLRWFV | 0.7776 |
| 60. |             | TTEDMLTVW | 0.7598 |

**Supplementary table 2:** Predicted HTL epitopes for structural and non-structural proteins of dengue virus

| <b>S.No.</b> | <b>Protein</b> | <b>Start and end position</b> | <b>Epitope</b>               |
|--------------|----------------|-------------------------------|------------------------------|
| 1.           | Protein C      | 39-59                         | QGRGPLKLYMALVAFLRFLTI        |
| 2.           |                | 69-85                         | WGTIKKSKAINVLRGFR            |
| 3.           | prM            | 31-46                         | VNMCTLMAMDLGELCE             |
| 4.           |                | 85-100                        | EHRRQKRSVALVPHVG             |
| 5.           |                | 129-148                       | RHPGFTMMAAILAYTIGTTH         |
| 6.           | Envelope       | 284-298                       | KCRLRMDKLQLKGMS              |
| 7.           |                | 406-422                       | MARGAKRMAILGDTAWDF           |
| 8.           |                | 439-465                       | VFGAIYGAAFSGVSWTMKILIGVIITW  |
| 9.           | NS-1           | 28-53                         | WTEQYKFQPESPSKLASAIQKAHEEG   |
| 10.          | NS-2A          | 51-66                         | RDLGRVMVMVGATMTD             |
| 11.          |                | 72-86                         | VTYLALLAAFKVRPT              |
| 12.          |                | 138-156                       | RNMEKYQLAVTIMAILCVP          |
| 13.          | NS-2B          | 1-20                          | SWPLNEAIMAVGMVSILASS         |
| 14.          |                | 26-43                         | IPMTGPLVAGGPLTVCYV           |
| 15.          | NS-3           | 2-16                          | GVLWDVPSPPPMGKA              |
| 16.          |                | 182-198                       | IFRKRRLTIMDLHPGAG            |
| 17.          |                | 261-279                       | CHATFTMRLLSVVRVFNYN          |
| 18.          |                | 437-453                       | GEERVILAGPMPVTHSS            |
| 19.          | NS-4A          | 13-30                         | LPTFMTQKARDALDNLAV           |
| 20.          |                | 78-93                         | IGKMTLGMCCIITASI             |
| 21.          |                | 95-116                        | LWYAQIQPHWIAASIILEFFLI       |
| 22.          | NS-4B          | 81-98                         | GWPLSKMDIGVPLLAIGC           |
| 23.          |                | 112-139                       | FLLVAHYAIIGPALQAKASREAQKRAAA |
| 24.          | NS-5           | 398-417                       | EFTRKVRNSNAALGAIIFTDEN       |
| 25.          |                | 609-626                       | LNTFTNMEAQLIRQMEGE           |

**Supplementary table 3:** Predicted B-cell epitopes for structural and non-structural proteins of dengue virus

| S.No. | Protein          | Position    | Sequence              | Score                 |       |
|-------|------------------|-------------|-----------------------|-----------------------|-------|
| 1.    | <b>Protein C</b> | 58          | TIPPTAGILKRWGTIKKSKA  | 0.998                 |       |
| 2.    |                  | 10          | NTPFNMLKRERNRVSTVQQL  | 0.984                 |       |
| 3.    | <b>prM</b>       | 59          | NEPEDIDCWCNSTSTWVTYG  | 0.998                 |       |
| 4.    |                  | 102         | GLETRTETWMSSEGAWKHVQ  | 0.87                  |       |
| 5.    |                  | 4           | TTRNGEPHMIVSRQEKGKSL  | 0.836                 |       |
| 6.    | <b>Envelope</b>  | 382         | VEPGQLKLNWFKKGSSIGQM  | 1                     |       |
| 7.    |                  | 217         | PLPWLPGADTQGSNWIQKET  | 0.994                 |       |
| 8.    |                  | 64          | KLTNTTTESRCPTQGEPSLN  | 0.992                 |       |
| 9.    |                  | 353         | TVNPIVTEKDSPVNIEAEP   | 0.987                 |       |
| 10.   |                  | 317         | HGTIVIRVQYEGDGSPCKIP  | 0.978                 |       |
| 11.   |                  | 152         | GNDTGKHGKEIKITPQSST   | 0.976                 |       |
| 12.   |                  | 96          | MVDRGWGNGCGLFGKGGIVT  | 0.914                 |       |
| 13.   |                  | 119         | FRCKKNMEGKVVQPENLEYT  | 0.886                 |       |
| 14.   |                  | 175         | LTGYGTVTMECSPRTGLDFN  | 0.869                 |       |
| 15.   |                  | 43          | FELIKTEAKQPATLRKYCIE  | 0.849                 |       |
| 16.   |                  | 241         | KNPHAKKQDVVVLGSQEGAM  | 0.813                 |       |
| 17.   |                  | 22          | DIVLEHGSCVTTMAKNKPTL  | 0.803                 |       |
| 18.   |                  | <b>NS-1</b> | 105                   | RPQPTTELKYSWKTWGKAKML | 1     |
| 19.   |                  |             | 293                   | NRGPLRRTTASGKLITEWC   | 0.992 |
| 20.   |                  |             | 325                   | GEDGCWYGMEIRPLKEKEEN  | 0.992 |
| 21.   | 135              |             | IDGPETAECPTNRAWNSLE   | 0.988                 |       |
| 22.   | 243              |             | IPKNLAGPVSQHNYRPGYHT  | 0.976                 |       |
| 23.   | 22               |             | TDNVHTWTEQYKFQPESPSK  | 0.877                 |       |
| 24.   | 84               |             | VKLTIMTGDIKGIMQAGKRS  | 0.851                 |       |
| 25.   | <b>NS-2B</b>     |             | 79                    | SEDGSMSIKNEEEEQTLTIL  | 1     |
| 26.   |                  | 23          | KNDIPMTGPLVAGGPLTVCY  | 0.947                 |       |
| 27.   | <b>NS-3</b>      | 569         | NNQILEENVEVEIWTKEGER  | 1                     |       |
| 28.   |                  | 129         | DFSPGTSGSPIIDKKGKVVG  | 0.999                 |       |
| 29.   |                  | 312         | IFMTATPPGSRDPFPQSNAP  | 0.998                 |       |
| 30.   |                  | 102         | PGKNPRAVQTKPGLFKTNAG  | 0.992                 |       |
| 31.   |                  | 78          | SYGGGWKLEGEWKEGEEVQV  | 0.987                 |       |
| 32.   |                  | 5           | WDVPSPPPMGKAELEDGAYR  | 0.978                 |       |
| 33.   |                  | 334         | DEEREIPERSWNSGHEWVTD  | 0.965                 |       |
| 34.   |                  | 167         | QTEKSIEDNPEIEDDIFRKR  | 0.928                 |       |
| 35.   |                  | 387         | RKTFDSEYAKTRTNDWDFVV  | 0.923                 |       |
| 36.   |                  | 456         | QRRGRIGRNPNKNENDQYIYM | 0.89                  |       |
| 37.   |                  | 496         | DNINTPEGIIPSMFEPEREK  | 0.859                 |       |
| 38.   |                  | 527         | GEARTTFVDLMRRGDLPVWL  | 0.855                 |       |

|     |              |                      |                       |       |
|-----|--------------|----------------------|-----------------------|-------|
| 39. |              | 435                  | TDGEERVILAGPMPVTHSSA  | 0.826 |
| 40. | <b>NS-4B</b> | 197                  | ATGPISTLWEGNPGRFWNTT  | 0.995 |
| 41. |              | 151                  | TVIDLDPIPYDPKFEKQLGQ  | 0.846 |
| 42. | <b>NS-5</b>  | 101                  | KGLTKGGPGHEEPIPMSTYG  | 1     |
| 43. |              | 878                  | EYTDYMPSMKRFRREEEEAG  | 0.998 |
| 44. |              | 524                  | KKEGGAMYADDTAGWDTRIT  | 0.997 |
| 45. |              | 575                  | NKVVRVQRPTPRGTVMDIIS  | 0.997 |
| 46. |              | 819                  | QENPW MEDKTPVESWEEIPY | 0.997 |
| 47. |              | 144                  | LCDIGESSPNPTVEAGRTRLR | 0.993 |
| 48. |              | 380                  | WLWKELGKKKTPRMCTREEF  | 0.974 |
| 49. |              | 351                  | QQRVFKEKVDTRTQEPKEGT  | 0.964 |
| 50. |              | 329                  | TKPWDVVPMTQAMTDTP     | 0.96  |
| 51. |              | 682                  | NDTGKIRKDIQQWEP SRGWN | 0.958 |
| 52. |              | 165                  | LNLVENWLNNTQFCIKVLN   | 0.953 |
| 53. |              | 20                   | LGKSEFQIYKKSIGQEVDR   | 0.943 |
| 54. |              | 304                  | AYHGSYETKQTGSASSMVNG  | 0.937 |
| 55. |              | 457                  | KREKKLGEFGKAKGSRAIY   | 0.936 |
| 56. |              | 283                  | KIKQEHETSWHYDQDHPYKT  | 0.926 |
| 57. |              | 781                  | SAVPSHWVPTSRTTWSIHAK  | 0.921 |
| 58. |              | 243                  | FTMRYKKATYEPDVLGSGT   | 0.891 |
| 59. | 215          | THEMYWVSNASGNIVSSVNM | 0.807                 |       |

**Supplementary table 4:** Interferon  $\gamma$  inducing epitopes for final vaccine construct predicted using IFNepitope server

| S.No. | Start-End | Sequence       | Score |
|-------|-----------|----------------|-------|
| 1.    | 7—22      | QYAAWNSLEVEDYA | 2     |
| 2.    | 8—23      | YAAWNSLEVEDYAA | 2     |
| 3.    | 9—24      | AAWNSLEVEDYAA  | 2     |
| 4.    | 10—25     | AWNSLEVEDYAA   | 2     |
| 5.    | 11—26     | WNSLEVEDYAA    | 2     |
| 6.    | 12—27     | NSLEVEDYAA     | 2     |
| 7.    | 13-28     | NSLEVEDYAA     | 2     |
| 8.    | 14-29     | SLEVEDYAA      | 2     |
| 9.    | 15-30     | LEVEDYAA       | 2     |
| 10.   | 16-31     | EVEDYAA        | 2     |
| 11.   | 17-32     | VEDYAA         | 2     |
| 12.   | 18-33     | EDYAA          | 2     |
| 13.   | 48-63     | KVDAIDGEYAA    | 1     |
| 14.   | 49-64     | VDAIDGEYAA     | 1     |
| 15.   | 50-65     | DAIDGEYAA      | 1     |
| 16.   | 85-100    | IDLPIPYAA      | 1     |
| 17.   | 86-101    | DLPIPYAA       | 1     |
| 18.   | 87-102    | LDPIPYAA       | 1     |
| 19.   | 88-103    | DPIPYAA        | 1     |
| 20.   | 89-104    | PIPYAA         | 1     |
| 21.   | 90-105    | IPYAA          | 1     |
| 22.   | 91-106    | PYAA           | 1     |
| 23.   | 92-107    | YAA            | 1     |
| 24.   | 133-148   | STYGWNLVAA     | 1     |
| 25.   | 134-149   | TYGWNLVAA      | 1     |
| 26.   | 135-150   | YGWNLVAA       | 1     |
| 27.   | 136-151   | GNLVAA         | 1     |
| 28.   | 137-152   | WNLVAA         | 1     |
| 29.   | 138-153   | NLVAA          | 1     |
| 30.   | 139-154   | LVA            | 1     |
| 31.   | 140-155   | VAA            | 1     |
| 32.   | 141-156   | AA             | 1     |
| 33.   | 157-172   | SSEGAWKHA      | 1     |
| 34.   | 158-173   | SEGAWKHA       | 1     |
| 35.   | 159-174   | EGAWKHA        | 1     |
| 36.   | 160-175   | GAWKHA         | 3     |
| 37.   | 161-176   | AWKHA          | 5     |
| 38.   | 162-177   | WKHA           | 5     |

|     |         |                 |          |
|-----|---------|-----------------|----------|
| 39. | 163-178 | KHAAYTTEAELTGYA | 4        |
| 40. | 164-179 | HAAYTTEAELTGYAA | 4        |
| 41. | 165-180 | AAYTTEAELTGYAAY | 4        |
| 42. | 166-181 | AYTTEAELTGYAAYV | 4        |
| 43. | 167-182 | YTTEAELTGYAAYVV | 4        |
| 44. | 236-251 | GVTYLALLAAFKVRP | 1.00042  |
| 45. | 289-304 | MDLHPGAGGPGPGGV | 1.187181 |
| 46. | 290-305 | DLHPGAGGPGPGGVL | 1.200201 |
| 47. | 291-306 | LHPGAGGPGPGGVLW | 1.15008  |
| 48. | 292-307 | HPGAGGPGPGGVLWD | 1.119006 |
| 49. | 293-308 | PGAGGPGPGGVLWDV | 1.038983 |
| 50. | 336-351 | QAKASREAQKRAAAG | 1        |
| 51. | 337-352 | AKASREAQKRAAAGP | 1        |
| 52. | 338-353 | KASREAQKRAAAGPG | 1        |
| 53. | 352-367 | GPGWTEQYKFQPESP | 1        |
| 54. | 353-368 | PGWTEQYKFQPESPS | 1        |
| 55. | 355-370 | WTEQYKFQPESPSKL | 1        |
| 56. | 356-371 | TEQYKFQPESPSKLA | 1        |
| 57. | 357-372 | EQYKFQPESPSKLAS | 1        |
| 58. | 358-373 | QYKFQPESPSKLASA | 1        |

**Supplementary table 5:** GalaxyRefine score of all predicted refined models

| <b>Model</b>   | <b>GDT-HA</b> | <b>RMSD</b>  | <b>MolProbity</b> | <b>Clash score</b> | <b>Poor Rotamer</b> |
|----------------|---------------|--------------|-------------------|--------------------|---------------------|
| <b>Initial</b> | <b>1.0000</b> | <b>0.000</b> | <b>3.646</b>      | <b>128.7</b>       | <b>4.1</b>          |
| MODEL 1        | 0.9261        | 0.478        | 2.396             | 28.3               | 0.6                 |
| MODEL 2        | 0.9240        | 0.480        | 2.619             | 29.5               | 1.8                 |
| MODEL 3        | 0.9207        | 0.483        | 2.588             | 29.9               | 1.5                 |
| MODEL 4        | 0.9163        | 0.496        | 2.447             | 26.9               | 1.2                 |
| MODEL 5        | 0.9158        | 0.501        | 2.471             | 30.8               | 0.6                 |
